# Supplementary material for: The anoikis-related gene signature predicts survival and correlates with immune infiltration in osteosarcoma
Source: publisher site journal article supplement (doi:10.18632/aging.205411), 2024-01-12
Supplement: Supplementary file [file aging-v16i1-205411-supplementary-material-SD1.pdf]

# SUPPLEMENTARY FIGURES

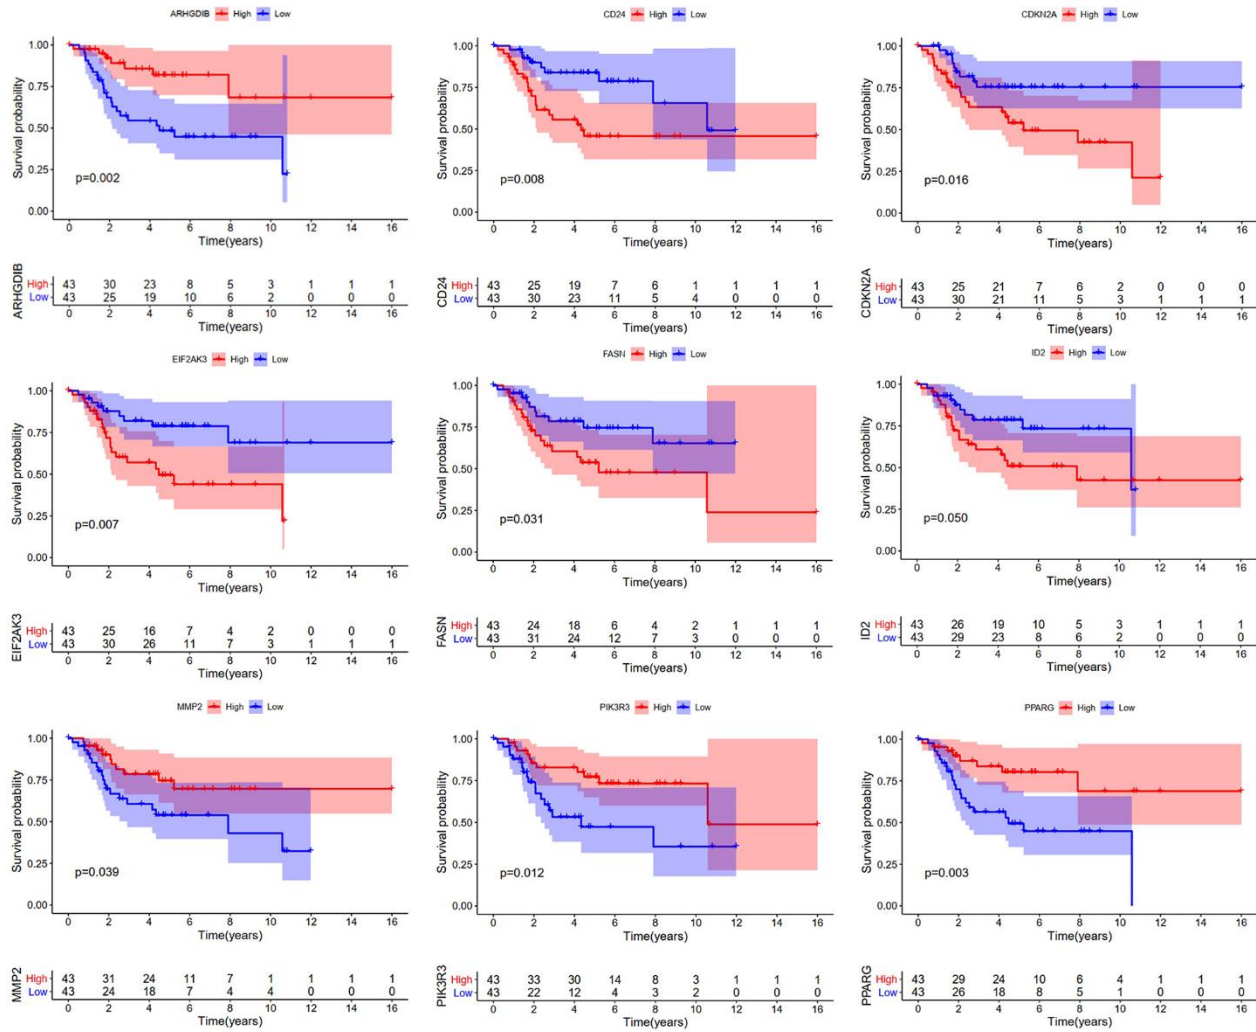

Supplementary Figure 1. Kaplan-Meier analysis of differentially expressed ARGs for OS in TCGA-TARGET.

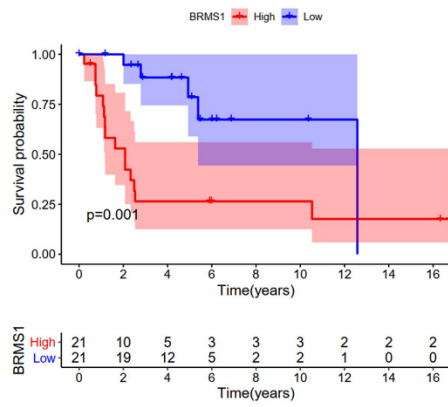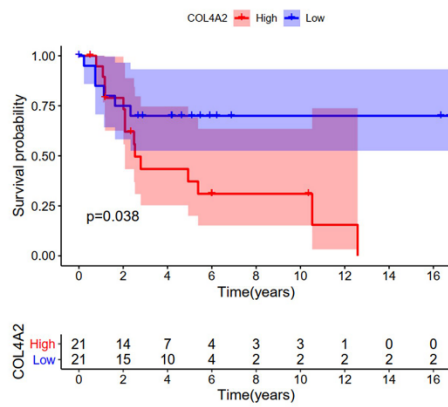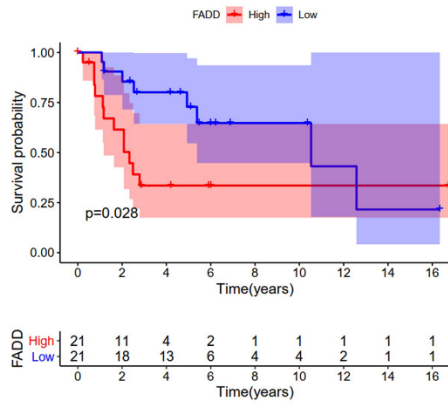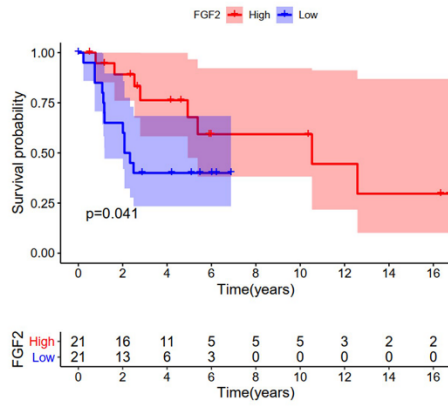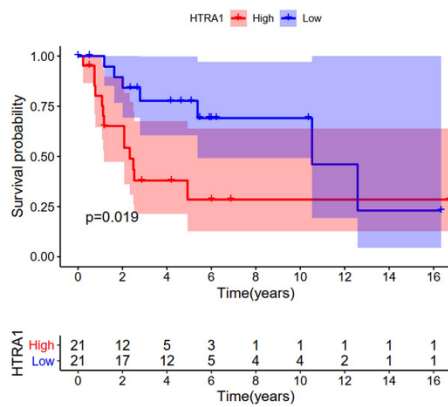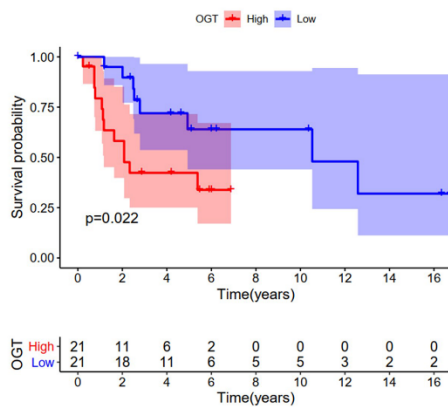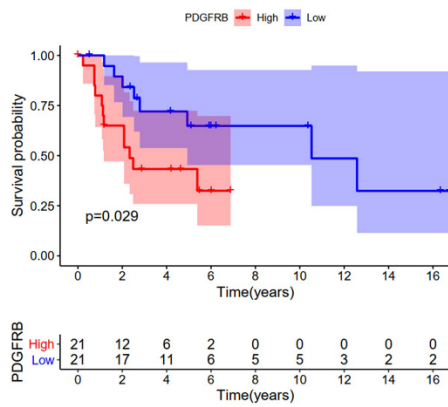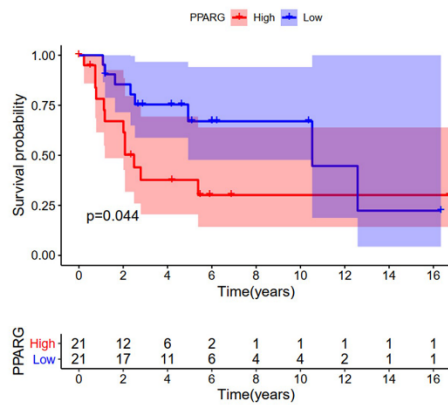

Supplementary Figure 2. Kaplan-Meier analysis of differentially expressed ARGs for RFS in GSE39058.

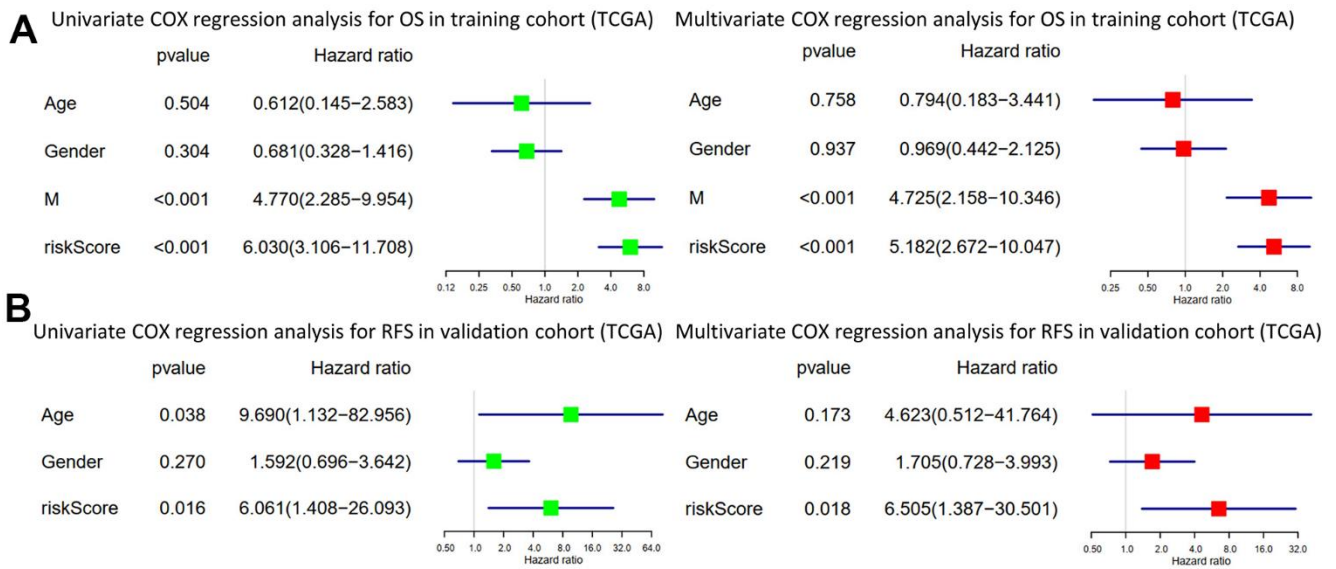

**Supplementary Figure 3.** Univariate and multivariate Cox analyses for OS (A) and RFS (B) in TCGA-TARGET.
